# Supplementary material for: Versatile microrobotics using simple modular subunits
Source: PubMed Central journal article supplement (PMC4964347; doi:10.1038/srep30472), 2016-07-28
Supplement: srep30472-s1.pdf [file srep30472-s1.pdf]

# **Versatile microrobotics using simple modular subunits**

**U Kei Cheang, Farshad Meshkati, Hoyeon Kim, Kyoungwoo Lee, Henry Chien Fu and  
Min Jun Kim**

## **Supplementary Movie Legends**

Movie S1: Assembly and disassembly for modular microrobotics. The movie shows the use of magnetohydrodynamics for assembly and disassembly.

Movie S2: Magnetic module orbit microswimmer. The movie shows how a module will orbit the microswimmer if assembly is unsuccessful.

Movie S3: Demonstration of modular microrobot. The movie shows a microswimmer transform from three-bead to nine beads, then breaks into two different microswimmers.

Movie S4: Swimming of a 10-bead microswimmer. The movie shows increase in swimming speed of a 10-bead microswimmer as the rotation frequency increased from 1 to 6 Hz.
